# Supplementary material for: IFT74 variants cause skeletal ciliopathy and motile cilia defects in mice and humans
Source: PubMed Central journal article supplement (PMC10298753; doi:10.1371/journal.pgen.1010796), 2023-06-14
Supplement: pgen.1010796.s002.pdf [file pgen.1010796.s002.pdf]

**Supplemental Table 1: Summary of known *IFT74* variants**

|                         |                 |                                                                                                                     |                                                             |                                                                                                  |                                         |                                      |                                                    |
|-------------------------|-----------------|---------------------------------------------------------------------------------------------------------------------|-------------------------------------------------------------|--------------------------------------------------------------------------------------------------|-----------------------------------------|--------------------------------------|----------------------------------------------------|
| <b>ATD/PCD/SRPS</b>     | Authors         | Bakey et al. Pazour, 2023                                                                                           | Bakey et al. Pazour, 2023                                   | Bakey et al. Pazour, 2023                                                                        | Bakey et al. Pazour, 2023               | Bakey et al. Pazour, 2023            | Hammar sjö et al. Grigelioniene                    |
|                         | Identifier      | 1.II.1                                                                                                              | 1.II.2                                                      | 2.II.2                                                                                           | 3.II.1                                  | 4.II.1                               | Family 20                                          |
|                         | Reference       | This work                                                                                                           | This work                                                   | This work                                                                                        | This work                               | This work                            | PMID: 33875766                                     |
|                         | Disease         | ATD / PCD                                                                                                           | ATD / PCD                                                   | ATD                                                                                              | ATD / SRPS                              | ATD / SRPS                           | ATD / SRPS                                         |
|                         | IFT74 Variant 1 | Exon 2 deletion (3kb) g.26959922_26962977delinsTTATTATA CTC                                                         | Exon 2 deletion (3kb) g.26959922_26962977delinsTTATTATACT C | Exon 2 deletion (3kb) g.26959922_26962977delinsTTATTATACTC                                       | c.974+4A>G (splice donor, intron 12)    | c.789+2T>G (splice donor, intron 10) | Exon 2 deletion (3kb) g.26959922_26962969delinsTTA |
|                         | IFT74 Variant 2 | Exon 2 deletion (3kb) g.26959922_26962977delinsTTATTATA CTC                                                         | Exon 2 deletion (3kb) g.26959922_26962977delinsTTATTATACT C | Exon 2 deletion (3kb) g.26959922_26962977delinsTTATTATACTC                                       | c.305+1664delG (splice donor, intron 4) | c.789+2T>G (splice donor, intron 10) | Exon 2 deletion (3kb) g.26959922_26962969delinsTTA |
| <b>JBTS</b>             | Authors         | Luo et al. Cao 2021                                                                                                 | Luo et al. Cao 2021                                         | Luo et al. Cao 2021                                                                              | Luo et al. Cao 2021                     | Zhongling et al. Xiaoru 2021         |                                                    |
|                         | Identifier      | 78C1 (Family 1_II:1)                                                                                                | 78C2 (Family 1_II:2)                                        | 103C (Family 2_II:1)                                                                             | 117C (Family 3_II:1)                    |                                      |                                                    |
|                         | Reference       | PMID: 33531668                                                                                                      | PMID: 33531668                                              | PMID: 33531668                                                                                   | PMID: 33531668                          | PMID: 34539760                       |                                                    |
|                         | Disease         | JBTS                                                                                                                | JBTS                                                        | JBTS                                                                                             | JBTS                                    | JBTS                                 |                                                    |
|                         | IFT74 Variant 1 | c.92delT (p.Leu31Hfs*25)                                                                                            | c.92delT (p.Leu31Hfs*25)                                    | c.306-24A>G # (p.Ser103_Arg135del)                                                               | c.85C>T (p.Arg29*)                      | c.853G>T (p.E285*)                   |                                                    |
|                         | IFT74 Variant 2 | c.535C>G (p.Q179E)                                                                                                  | c.535C>G (p.Q179E)                                          | c.535C>G (p.Q179E)                                                                               | c.535C>G (p.Q179E)                      | c.535C>G (p.Q179E)                   |                                                    |
|                         |                 |                                                                                                                     |                                                             | #causes skipping of exon 5 resulting in an in-frame 33-amino acid deletion from Ser103 to Arg135 |                                         |                                      |                                                    |
| <b>BBS</b>              | Authors         | Lindstrand et al. Katsanis 2016                                                                                     | Kleinendorstvan et al. Haelst 2020                          | Mardy et al. Slavotinek 2021                                                                     |                                         |                                      |                                                    |
|                         | Identifier      |                                                                                                                     |                                                             |                                                                                                  |                                         |                                      |                                                    |
|                         | Reference       | PMID: 27486776                                                                                                      | PMID: 32144365                                              | PMID: 33748949                                                                                   |                                         |                                      |                                                    |
|                         | Disease         | BBS                                                                                                                 | BBS                                                         | BBS                                                                                              |                                         |                                      |                                                    |
|                         | IFT74 Variant 1 | Deletion of exon 14–19 (Exon 14 starts with Gly352; exon 19 ends with Glu561)                                       | c.371_372del (p.Q124Rfs*9)                                  | c.1685-1G>T # (splice defect, intron 19)                                                         |                                         |                                      |                                                    |
|                         | IFT74 Variant 2 | c.1685-1G>T # (splice defect, intron 19)                                                                            | c.1685-1G>T # (splice defect, intron 19)                    | c.1685-1G>T # (splice defect, intron 19)                                                         |                                         |                                      |                                                    |
|                         |                 | #Exon 20 starts at Phe562. This variant could delete the last 39 residues.                                          |                                                             |                                                                                                  |                                         |                                      |                                                    |
| <b>Male Infertility</b> | Authors         | Lorès et al. Touré 2021                                                                                             | Lorès et al. Touré 2021                                     |                                                                                                  |                                         |                                      |                                                    |
|                         | Identifier      | patient 1                                                                                                           | patient 2                                                   |                                                                                                  |                                         |                                      |                                                    |
|                         | Reference       | PMID: 33689014                                                                                                      | PMID: 33689014                                              |                                                                                                  |                                         |                                      |                                                    |
|                         | Disease         | Spermatogenic failure                                                                                               | Spermatogenic failure                                       |                                                                                                  |                                         |                                      |                                                    |
|                         | IFT74 Variant 1 | c.256G > A # (p.Gly86Ser) and (p.Leu77_Gly86del)                                                                    | c.256G > A # (p.Gly86Ser) and (p.Leu77_Gly86del)            |                                                                                                  |                                         |                                      |                                                    |
|                         | IFT74 Variant 2 | c.256G > A # (p.Gly86Ser) and (p.Leu77_Gly86del)                                                                    | c.256G > A # (p.Gly86Ser) and (p.Leu77_Gly86del)            |                                                                                                  |                                         |                                      |                                                    |
|                         |                 | #Causes a splicing defect that produces aberrant messages. A common variant deletes amino acids Leu77 through Gly86 |                                                             |                                                                                                  |                                         |                                      |                                                    |
