# Supplementary material for: IFT74 variants cause skeletal ciliopathy and motile cilia defects in mice and humans
Source: PubMed Central journal article supplement (PMC10298753; doi:10.1371/journal.pgen.1010796), 2023-06-14
Supplement: pgen.1010796.s009.pdf [file pgen.1010796.s009.pdf]

## Supplemental Data 1: Sequence of MmIft74 cDNA between exons 2 and 5.

Primers: MmIft74\_exon2\_for ctcggggtggaataggactaacagg  
MmIft74\_exon5\_rev gaagcttataatttcagttgtaagttcac

>MmIft74<sup>wild type</sup>

Ctcggggtggaataggactaacaggaaggcctccttctggaataagacctccatctggcaatgttcgagtggcaactgcaatgccaccaacaacagcaagaccaggt  
ctcgtggtggcccttagggactggtggagtttgcacatcctcaaatcaagttgctgatcgtcctgtgaccaacaagtttgagtggaatgaagactggcatgaaaggctc  
ccagaggcaaatTTtagacaaatcttactatcttggacttcttaggagcaaaataagtgaactfacaactgaaattaataagcttc

>MmIft74<sup>Tm1a</sup>

ctcggggtggaataggactaacaggaaggcctccttctggaataagacctccatctggcaatgttcgagtggcaactgcaGTCCCAGGTCCCGAAAAC  
CAAAGAAGAAGAACCCCTAACAAAGAGGACAAGCGGCCTCGCACAGCCTTCACTGCTGAGCAGCTCCA  
GAGGCTCAAGGCTGAGTTTCAGACCAACAGatgccaccaacaacagcaagaccaggttctcgtggtggcccttagggactggtggagttt  
gtcatcctcaaatcaagttgctgatcgtcctgtgaccaacaagtttgagtggaatgaagactggcatgaaaggctcccagaggcaaatTTtagacaaatcttactatctt  
gacttcttaggagcaaaataagtgaactfacaactgaaattaataagcttc

>MmIft74<sup>Tm1b</sup>

ctcggggtggaataggactaacaggaaggcctccttctggaataagacctccatctggcaatgttcgagtggcaactgcaGTTCCCGAAAACCA  
AAGAAGAAGAACCCTAACAAAGAGGACAAGCGGCCTCGCACAGCCTTCACTGCTGAGCAGCTCCAGA  
GGCTCAAGGCTGAGTTTCAGACCAACaggtcccagaggcaaatTTtagacaaatcttactatcttggacttcttaggagcaaaataagtgaactf  
caactgaaattaataagcttc

>MmIft74<sup>Tm1d</sup>

ctcggggtggaataggactaacaggaaggcctccttctggaataagacctccatctggcaatgttcgagtggcaactgcaGTTCCCGAAAACCA  
ctatcttggacttcttaggagcaaaataagtgaactfacaactgaaattaataagcttc
