# Supplementary material for: IFT74 variants cause skeletal ciliopathy and motile cilia defects in mice and humans
Source: PubMed Central journal article supplement (PMC10298753; doi:10.1371/journal.pgen.1010796), 2023-06-14
Supplement: pgen.1010796.s010.pdf [file pgen.1010796.s010.pdf]

## Supplemental Data 2: Predicted Ift74 protein sequence in human and mouse alleles.

>HsIFT74 Wild Type

MASNHKSSAPRPISRGGIGLTGRPPSGIRPPSGNVRVATAMPPPTARPGSRGGPLGTGGVLSSQIKVAHRPVT  
QOGLTGMKTGTKGPQRQILDKSYYLGLLRSKISELTTEVN...

>HsIFT74 Predicted deletion resulting from loss of exon 2

MPPPTARPGSRGGPLGTGGVLSSQIKVAHRPVTQOGLTGMKTGTKGPQRQILDKSYYLGLLRSKISELTTEV  
N...

>MmIft74 Wild type

MASNHKSSAPRPISRGGIGLTGRPPSGIRPPSGNVRVATAMPPPTARPGSRGGPLGTGGVLSSQIKVADRPVT  
QOGLSGMKTGMKGPQRQILDKSYYLGLLRSKISELTTEIN...

>MmIft74 Tm1a

MASNHKSSAPRPISRGGIGLTGRPPSGIRPPSGNVRVATAVPGPENQRRRTLTKRTSGLAQPSLLSSSRGSRL  
SFRPTDATNNSKTRFSWWSLRDWWSFVISNQSC\*

>MmIft74 Tm1a Reinitiation

MPPPTARPGSRGGPLGTGGVLSSQIKVADRPVTQOGLSGMKTGMKGPQRQILDKSYYLGLLRSKISELTTEI  
N...

>MmIft74 Tm1b

MASNHKSSAPRPISRGGIGLTGRPPSGIRPPSGNVRVATAVPGPENQRRRTLTKRTSGLAQPSLLSSSRGSRL  
SFRPT-----GPQRQILDKSYYLGLLRSKISELTTEIN...

>MmIft74 Tm1d

MASNHKSSAPRPISRGGIGLTGRPPSGIRPPSGNVRVATAVPRGKF\*  
GPQRQILDKSYYLGLLRSKISELTTEIN...

Methionines are in red text

Exon 3 is underlined

Non-native Ift74 sequence
