# Supplementary material for: IFT74 variants cause skeletal ciliopathy and motile cilia defects in mice and humans
Source: PubMed Central journal article supplement (PMC10298753; doi:10.1371/journal.pgen.1010796), 2023-06-14
Supplement: pgen.1010796.s011.pdf [file pgen.1010796.s011.pdf]

### Supplemental Data 3: Genotyping Primers

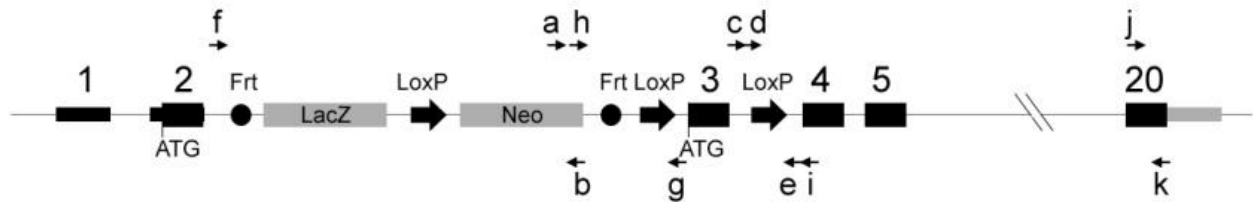

|                             |                              |
|-----------------------------|------------------------------|
| a: LacZ Fwd                 | TACCGTTGATGTTGAAGTGCC        |
| b: LacZ Rev                 | GACTGTAGCGGCTGATGTTG         |
| c: IFT74_WT_Fwd.1           | GAATGCATGTGAAATACATTGTGAA    |
| d: IFT74_Intron3_loxP_fwd.1 | CGCAATTAATGATAACTTCGTATAGC   |
| e: IFT74_intron3_Rev        | GAGAAAAGCAGTAATAGTTCTCATCTCC |
| f: IFT74_intron2_Frt_Fwd.2  | CTGAGTGAAAGTGGAGGC           |
| g: IFT74_intron2_Frt2_Rev.3 | CAAGAAAGCTGGGTCTAGAT         |
| h: IFT74_LacZ_SV40_Fwd2     | TAATAATAACCGGGCAGGGG         |
| i: IFT74_Intron3_Rev.1      | GAGGGAAGCATAATGTCAGTC        |
| j: 796_Ift74_F              | CCTCACTTTATTTMAGAATGCAAGC    |
| k: 796_Ift74_R              | GTTACAGAACAGAACTGGTGCT       |

a+b = LacZ band of approximately 300bp

c+e = Wild type band of approximately 400bp

d+e = Tm1a band of approximately 400bp

f+g = Tm1c band of approximately 200bp and wild type band of approximately 300bp

h+i = Tm1b band of approximately 700bp

e+f = Tm1e band of 539 bp and 1298 bp in wild type

j+k = 300 bp band that cuts in half with *AciI* when the *Ift74<sup>b2b796Clo</sup>* mutation is present
