# Supplementary material for: IFT74 variants cause skeletal ciliopathy and motile cilia defects in mice and humans
Source: PubMed Central journal article supplement (PMC10298753; doi:10.1371/journal.pgen.1010796), 2023-06-14
Supplement: pgen.1010796.s012.pdf [file pgen.1010796.s012.pdf]

## Supplemental Data 4. Supplemental to Support Figure 6: *Ift74<sup>Tm1a</sup>* Cilia.

### Quantification of ciliary defects by TEM (see Figure 6C)

Cilia from control and *Ift74<sup>Tm1a</sup>* mutant trachea were imaged by TEM and ciliary defects counted.

| Animal | Age | <i>Ift74<sup>Tm1a</sup></i> Genotype | Missing Central Pair | Super-numary MTs | Missing MTs | Displaced Outer Doublets | Unorganized Cilia | Normal | Total | Percentage of defective cilia |
|--------|-----|--------------------------------------|----------------------|------------------|-------------|--------------------------|-------------------|--------|-------|-------------------------------|
| 21297  | P19 | Mut                                  | 1                    | 4                | 2           | 1                        | 2                 | 110    | 120   | 8.3                           |
| 21298  | P19 | Mut                                  | 0                    | 0                | 0           | 0                        | 1                 | 109    | 110   | 0.9                           |
| 21300  | P19 | Het                                  | 0                    | 0                | 0           | 0                        | 0                 | 62     | 62    | 0                             |
| 21301  | P19 | Het                                  | 0                    | 0                | 0           | 0                        | 1                 | 70     | 71    | 1.4                           |
| 21798  | P15 | Mut                                  | 0                    | 14               | 12          | 3                        | 9                 | 189    | 227   | 16.7                          |
| 21800  | P15 | WT                                   | 0                    | 2                | 0           | 0                        | 2                 | 274    | 278   | 1.4                           |
| 21828  | P8  | Het                                  | 0                    | 0                | 0           | 0                        | 0                 | 147    | 147   | 0                             |
| 21829  | P8  | Mut                                  | 2                    | 8                | 11          | 3                        | 1                 | 203    | 228   | 11.0                          |
