# Supplementary material for: IFT74 variants cause skeletal ciliopathy and motile cilia defects in mice and humans
Source: PubMed Central journal article supplement (PMC10298753; doi:10.1371/journal.pgen.1010796), 2023-06-14
Supplement: pgen.1010796.s013.pdf [file pgen.1010796.s013.pdf]

## Supplemental Data 5. Supplemental to Support Figure 6: Ift74<sup>Tm1a</sup> Cilia.

### Localization of IFT proteins to MEF cilia (see Figure 6E)

Localization of IFT proteins in wild type and Ift74<sup>Tm1a</sup> MEF cilia. N=3 cell lines for each genotype, 25 cells examined from each cell line. P determined by student t-test.

IFT27 WT 100+/-0% spot at the base  
MT 39+/-10% spot at the base  
P=0.0005

IFT140 WT 100+/-0% spot at the base  
MT 100+/-0% spot at the base  
P=ns

BBS9 WT 57+/-10% spot at the base  
MT 74+/-8% spot at the base  
P=ns

Lztf11 WT 100+/-0% no cilia label  
MT 100+/-0% no cilia label  
P=ns

BBS3 WT 100+/-0% no cilia label  
MT 100+/-0% no cilia label  
P=ns
